# Supplementary material
Source: PubMed Central journal article supplement (PMC5695114)
Supplement: IAI.00378-17_zii999092209s1.pdf [file IAI.00378-17_zii999092209s1.pdf]

1 ***Enterococcus faecalis* promotes innate immune suppression and**  
 2 **polymicrobial catheter-associated urinary tract infection**

3 Brenda Yin Qi Tien, Hwee Mian Sharon Goh, Kelvin Kian Long Chong, Soumili  
 4 Bhaduri-Tagore, Sarah Holec, Regine Dress, Florent Ginhoux, Molly A. Ingersoll,  
 5 Rohan B. H. Williams, Kimberly A. Kline

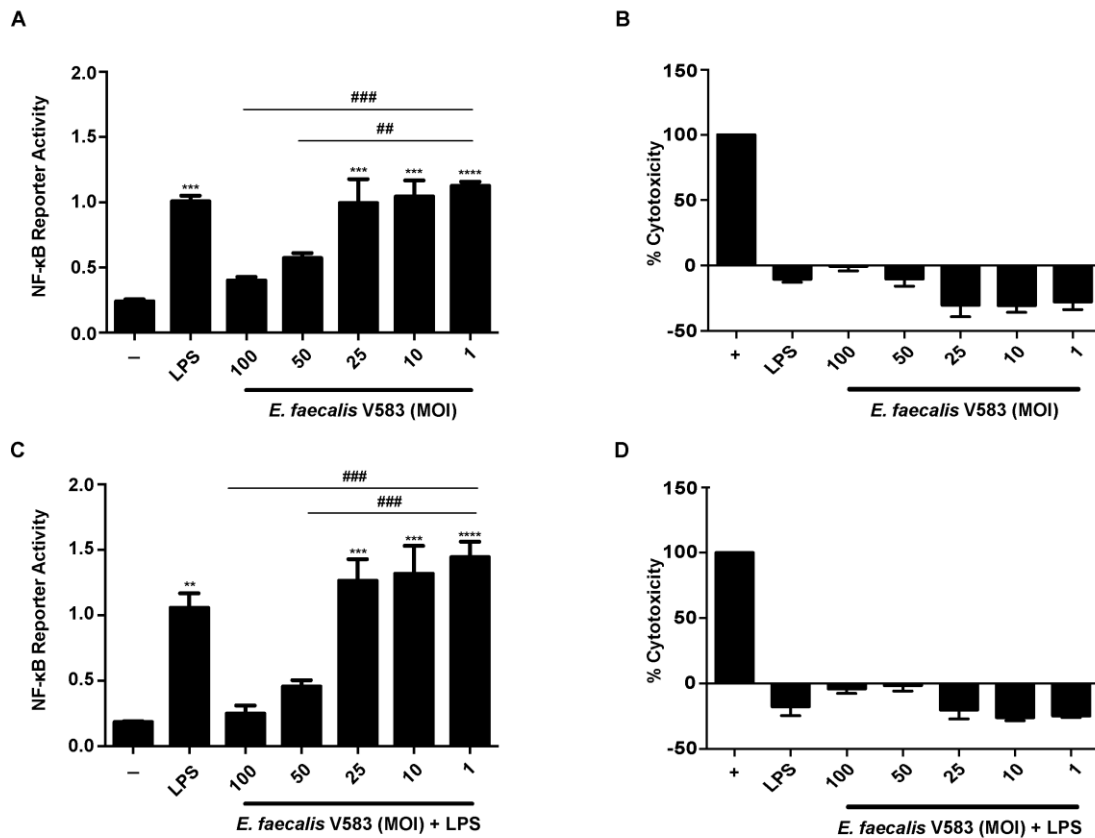

6  
 7 **Fig. S1. *E. faecalis* vancomycin-resistant strain V583 prevents NF-κB activation**  
 8 **in mouse macrophages.**

9 Mouse RAW 267.4 macrophages were infected with either live *E. faecalis* alone, or  
 10 treated concurrently with LPS (100 ng/ml) at the specified MOI for 6 hours prior to  
 11 measurement of NF-κB-driven SEAP reporter activity and percentage cytotoxicity  
 12 (LDH activity). **(A)** NF-κB-driven SEAP reporter activity and **(B)** LDH activity of RAW  
 13 264.7 macrophages infected by *E. faecalis* alone. **(C)** NF-κB-driven SEAP reporter  
 14 activity and **(D)** LDH activity in the presence of *E. faecalis* and LPS. NF-κB-driven

15 SEAP reporter assays: exposure to media alone (-) represents background NF- $\kappa$ B  
16 reporter activity and stimulation with LPS represents positive controls for reporter  
17 activity. LDH assays: Triton-X treatment served as a positive control (+) for cell  
18 death. Data are combined from 3 independent experiments; mean values are  
19 graphed and error bars represent standard error of the mean (SEM). Statistical  
20 analysis was performed using the one-way ANOVA test followed with post-hoc  
21 Tukey's multiple comparison test between all conditions where  $**P<0.01$ ,  
22  $***P<0.001$ ,  $****P<0.0001$  as compared to media alone (-) controls; and where  
23  $##P<0.01$  and  $###P<0.001$  among all of the MOIs as compared to MOI 100.

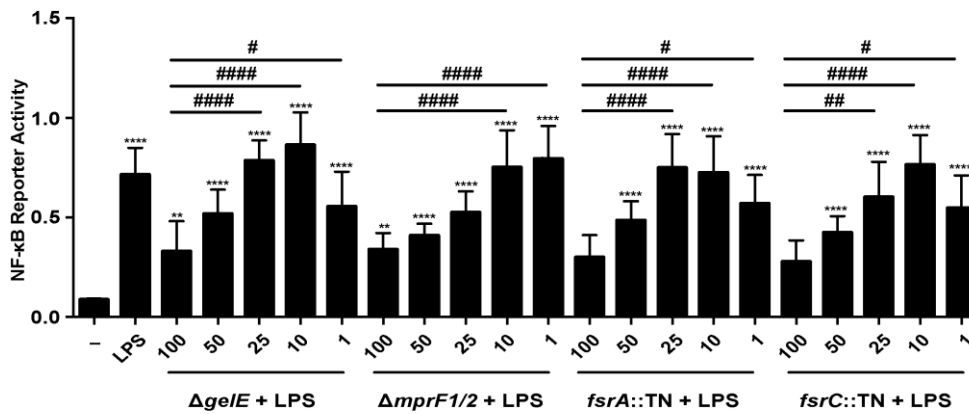

25

26 **Fig. S2. *E. faecalis gelE*, *mprF1/2* and *fsrAC* are not involved in NF-κB immune**  
 27 **suppression in mouse macrophages.**

28 Mouse RAW 267.4 macrophages were infected with live *E. faecalis* mutant strains  
 29 concurrently with LPS (100 ng/ml) at the specified MOI for 6 hours prior to  
 30 measurement of NF-κB-driven SEAP reporter activity. In NF-κB-driven SEAP  
 31 reporter assays, exposure to media alone (-) represents background NF-κB reporter  
 32 activity and stimulation with LPS represents the positive control for reporter activity.  
 33 Data are combined from 3 independent experiments; mean values are graphed and  
 34 error bars represent standard error of the mean (SEM). Statistical analysis was  
 35 performed using the one-way ANOVA test followed with post-hoc Tukey's multiple  
 36 comparison test between all conditions where  $**P < 0.01$  and  $****P < 0.0001$  as  
 37 compared to media alone (-) controls; and where  $\#P < 0.05$ ,  $\##P < 0.01$  and  $\###P < 0.001$   
 38 among all of the MOIs as compared to MOI 100.

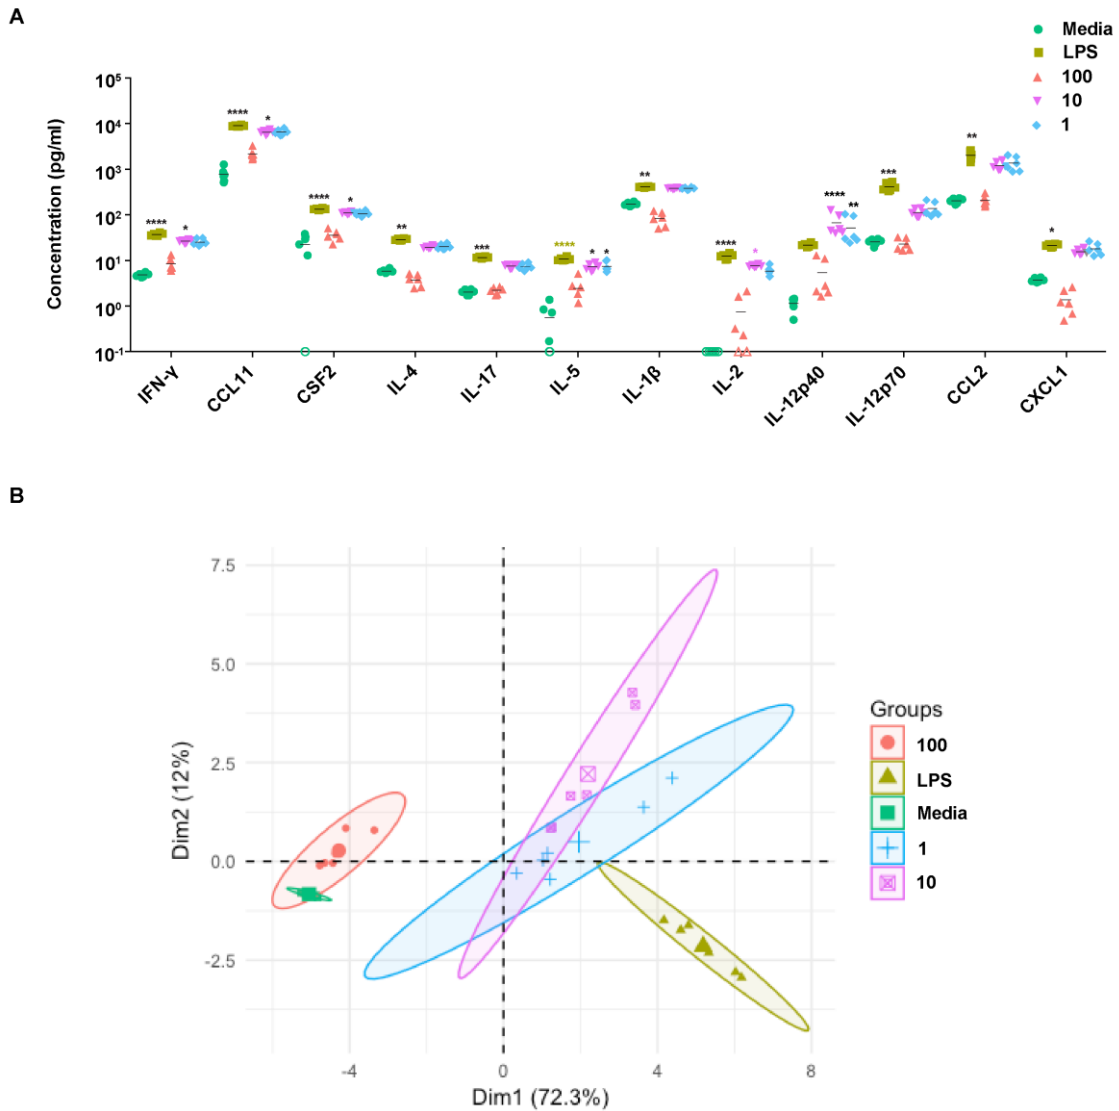

40

41 **Fig. S3. *E. faecalis* prevents NF- $\kappa$ B driven cytokine and chemokine expression.**

42 Mouse RAW 267.4 macrophages were stimulated with live *E. faecalis*, and **(A)** the  
 43 absolute concentrations in pg/ml of cytokines from filtered supernatants collected 6  
 44 hpi at various conditions are shown. Horizontal bars represent the mean value for  
 45 each condition. Statistical significance was determined by the Kruskal-Wallis test  
 46 where \* $P < 0.05$ , \*\* $P < 0.01$ , \*\*\* $P < 0.001$ , \*\*\*\* $P < 0.0001$  as compared to media alone  
 47 control. Open symbols represent data points that are zero and plotted on the X-axis  
 48 for representation. **(B)** Principal component analysis (PCA) of cytokines and

49 chemokines from filtered supernatants collected at 6 hpi from different conditions.  
50 Ellipses represent the distribution of each condition. The two dimensions measured  
51 explained a total of 84.3% of variability of all analytes measured.

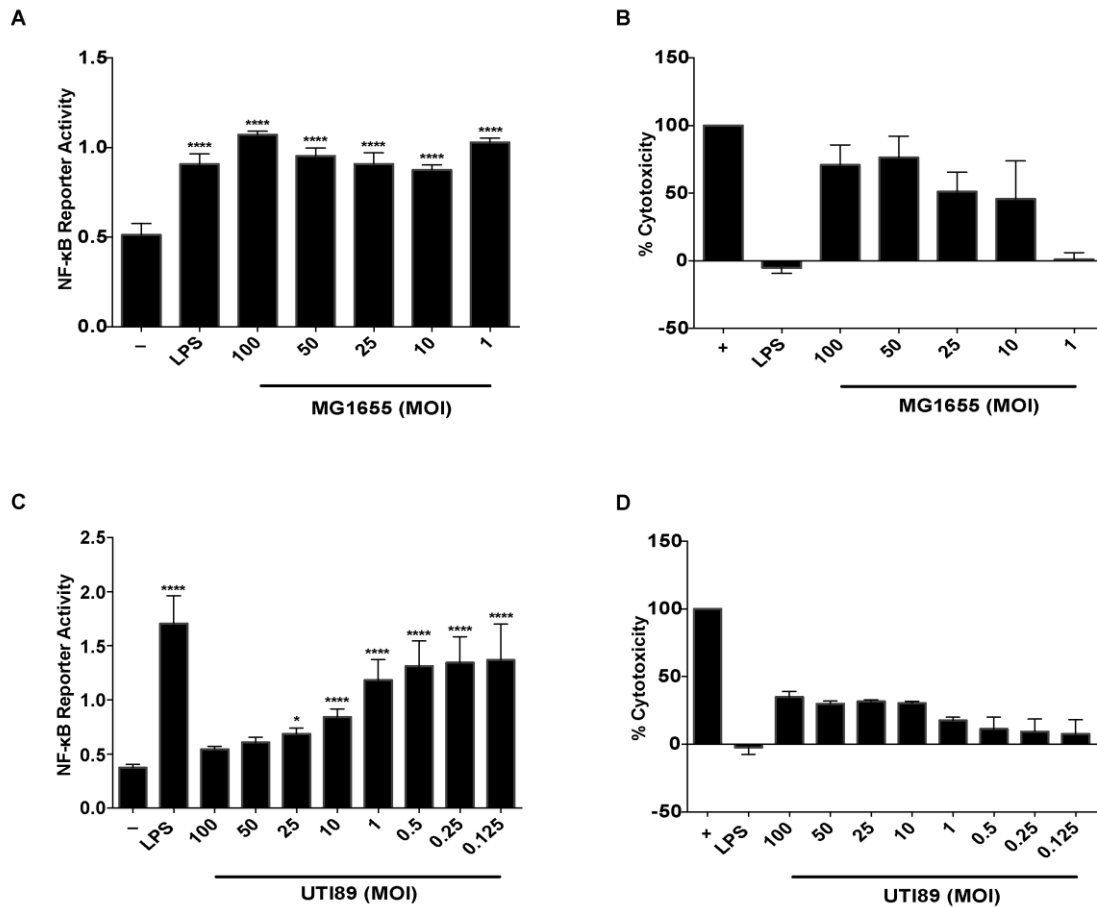

52

53 **Fig. S4. *E. coli* activates NF-κB at low MOI.**

54 Mouse RAW 264.7 macrophages were stimulated with live *E. coli* K12 strain  
 55 MG1655 or UTI89 for 6 hours. **(A)** NF-κB-driven SEAP reporter activity and **(B)** LDH  
 56 activity of RAW 264.7 macrophages infected by MG1655 alone. **(C)** NF-κB-driven  
 57 SEAP reporter activity and **(D)** LDH activity of RAW 264.7 macrophages infected by  
 58 UTI89 alone. NF-κB-driven SEAP reporter assays: exposure to media alone (-)  
 59 represents background NF-κB reporter activity and stimulation with LPS represents  
 60 positive controls for reporter activity. LDH assays: Triton-X treatment served as a  
 61 positive control (+) for cell death. Data are combined from 3 independent  
 62 experiments; mean values are graphed and error bars represent standard error of  
 63 the mean (SEM). Statistical analysis was performed by the one-way ANOVA test

64 with Tukey's Multiple Comparison Test where  $*P < 0.05$ ,  $****P < 0.0001$ , as compared  
65 to media (-) control

**Supplementary Table 1:** Top ranked 55 differentially expressed transcripts

| <i>Entrez</i> | <i>refseq</i> | <i>symbol</i> | <i>baseMean</i> | <i>log2FoldChange</i> | <i>lfcSE</i> | <i>stat</i> | <i>pvalue</i> | <i>padj</i> |
|---------------|---------------|---------------|-----------------|-----------------------|--------------|-------------|---------------|-------------|
| 15945         | NM_021274     | Cxcl10        | 65.55           | -2.21                 | 0.30         | -7.27       | 3.72E-13      | 3.86E-09    |
| 219132        | NM_199015     | Phf11d        | 189.06          | -0.98                 | 0.16         | -5.99       | 2.09E-09      | 1.08E-05    |
| 24110         | NM_011909     | Usp18         | 221.32          | -1.19                 | 0.20         | -5.89       | 3.76E-09      | 1.30E-05    |
| 15951         | NM_008329     | Ifi204        | 485.17          | -1.17                 | 0.21         | -5.66       | 1.48E-08      | 3.84E-05    |
| 100038882     | NM_015783     | Isg15         | 503.79          | -1.34                 | 0.24         | -5.48       | 4.30E-08      | 8.56E-05    |
| 236312        | NM_175026     | Pyhin1        | 117.51          | -1.49                 | 0.27         | -5.45       | 4.95E-08      | 8.56E-05    |
| 11687         | NM_009660     | Alox15        | 75.21           | -2.28                 | 0.43         | -5.35       | 9.03E-08      | 1.34E-04    |
| 19039         | NM_011150     | Lgals3bp      | 4444.36         | -0.72                 | 0.14         | -5.25       | 1.55E-07      | 2.01E-04    |
| 226695        | NM_172648     | Ifi205        | 173.86          | -1.69                 | 0.33         | -5.16       | 2.47E-07      | 2.85E-04    |
| 226691        | NM_001204910  | Al607873      | 389.99          | -1.10                 | 0.22         | -5.11       | 3.16E-07      | 3.26E-04    |
| 55932         | NM_018734     | Gbp3          | 356.87          | -1.13                 | 0.22         | -5.10       | 3.46E-07      | 3.26E-04    |
| 16688         | NM_010669     | Krt6b         | 30.61           | -2.40                 | 0.49         | -4.95       | 7.54E-07      | 6.52E-04    |
| 100040462     | NM_001170853  | Mndal         | 247.18          | -1.03                 | 0.21         | -4.90       | 9.48E-07      | 7.57E-04    |
| 231655        | NM_145209     | Oasl1         | 123.10          | -1.23                 | 0.25         | -4.87       | 1.13E-06      | 8.39E-04    |
| 209086        | NM_010156     | Samd9l        | 438.19          | -0.65                 | 0.13         | -4.82       | 1.47E-06      | 1.01E-03    |
| 11801         | NM_009690     | Cd5l          | 13.37           | -2.45                 | 0.52         | -4.75       | 2.06E-06      | 1.34E-03    |
| 210808        | NM_172488     | Lacc1         | 117.05          | -0.86                 | 0.18         | -4.71       | 2.51E-06      | 1.54E-03    |
| 64380         | NM_029499     | Ms4a4c        | 268.69          | -1.40                 | 0.30         | -4.66       | 3.09E-06      | 1.78E-03    |
| 12263         | NM_013484     | C2            | 640.30          | -0.89                 | 0.19         | -4.65       | 3.32E-06      | 1.81E-03    |
| 67138         | NM_025992     | Herc6         | 168.03          | -0.75                 | 0.16         | -4.59       | 4.48E-06      | 2.32E-03    |
| 17858         | NM_013606     | Mx2           | 49.65           | -1.38                 | 0.30         | -4.53       | 5.77E-06      | 2.85E-03    |
| 667370        | NM_001005858  | Ifit3b        | 58.01           | -1.67                 | 0.37         | -4.51       | 6.34E-06      | 2.98E-03    |
| 15959         | NM_010501     | Ifit3         | 302.12          | -1.73                 | 0.38         | -4.51       | 6.60E-06      | 2.98E-03    |
| 99899         | NM_133871     | Ifi44         | 23.39           | -1.56                 | 0.35         | -4.49       | 7.02E-06      | 3.04E-03    |
| 15957         | NM_008331     | Ifit1         | 81.73           | -1.53                 | 0.35         | -4.38       | 1.20E-05      | 4.96E-03    |
| 80861         | NM_030150     | Dhx58         | 243.06          | -0.94                 | 0.22         | -4.35       | 1.34E-05      | 5.34E-03    |
| 67775         | NM_023386     | Rtp4          | 572.00          | -0.96                 | 0.22         | -4.34       | 1.40E-05      | 5.39E-03    |
| 381308        | NM_001033450  | Mnda          | 108.42          | -1.20                 | 0.28         | -4.30       | 1.70E-05      | 6.29E-03    |
| 276950        | NM_181545     | Slfn8         | 67.92           | -0.99                 | 0.23         | -4.28       | 1.89E-05      | 6.78E-03    |
| 58203         | NM_021394     | Zbp1          | 132.37          | -0.98                 | 0.23         | -4.26       | 2.04E-05      | 7.05E-03    |
| 20293         | NM_011331     | Ccl12         | 98.27           | -1.47                 | 0.35         | -4.23       | 2.32E-05      | 7.75E-03    |
| 232413        | NM_177686     | Clec12a       | 98.09           | -1.08                 | 0.26         | -4.22       | 2.45E-05      | 7.93E-03    |
| 14938         | NM_010370     | Gzma          | 25.78           | -1.82                 | 0.43         | -4.21       | 2.58E-05      | 8.10E-03    |
| 75750         | NM_029415     | Slc10a6       | 111.46          | -1.25                 | 0.30         | -4.18       | 2.95E-05      | 9.01E-03    |
| 230793        | NM_146155     | Ahdc1         | 452.17          | 0.49                  | 0.12         | 4.16        | 3.23E-05      | 9.58E-03    |
| 327959        | NM_001037713  | Xaf1          | 281.48          | -0.92                 | 0.22         | -4.12       | 3.76E-05      | 1.08E-02    |
| 69550         | NM_198095     | Bst2          | 1465.05         | -0.91                 | 0.22         | -4.11       | 3.96E-05      | 1.08E-02    |
| 20556         | NM_011408     | Slfn2         | 1014.92         | -0.82                 | 0.20         | -4.11       | 3.97E-05      | 1.08E-02    |
| 231507        | NM_139198     | Plac8         | 3113.92         | -0.63                 | 0.15         | -4.08       | 4.48E-05      | 1.19E-02    |
| 76933         | NM_029803     | Ifi27l2a      | 2431.94         | -0.97                 | 0.24         | -4.07       | 4.68E-05      | 1.21E-02    |
| 234311        | NM_001081215  | Ddx60         | 56.71           | -1.12                 | 0.28         | -4.05       | 5.07E-05      | 1.28E-02    |
| 170743        | NM_133211     | Tlr7          | 65.45           | -1.21                 | 0.30         | -4.03       | 5.53E-05      | 1.37E-02    |
| 20684         | NM_013673     | Sp100         | 390.96          | -0.75                 | 0.19         | -4.01       | 6.01E-05      | 1.45E-02    |
| 16145         | NM_018738     | lgtp          | 335.77          | -0.75                 | 0.19         | -3.94       | 8.18E-05      | 1.89E-02    |
| 80285         | NM_030253     | Parp9         | 495.20          | -0.55                 | 0.14         | -3.94       | 8.20E-05      | 1.89E-02    |
| 14469         | NM_010260     | Gbp2          | 733.54          | -0.76                 | 0.19         | -3.92       | 8.78E-05      | 1.98E-02    |
| 23962         | NM_011854     | Oasl2         | 443.20          | -0.85                 | 0.22         | -3.88       | 1.07E-04      | 2.35E-02    |
| 18619         | NM_001002927  | Penk          | 379.03          | -0.89                 | 0.23         | -3.86       | 1.15E-04      | 2.48E-02    |
| 16153         | NM_010548     | Il10          | 11.90           | -1.59                 | 0.41         | -3.83       | 1.27E-04      | 2.69E-02    |
| 16500         | NM_008420     | Kcnb1         | 75.40           | 0.84                  | 0.22         | 3.79        | 1.53E-04      | 3.11E-02    |
| 100041546     | NM_001099217  | Ly6c2         | 134.86          | -1.22                 | 0.32         | -3.78       | 1.55E-04      | 3.11E-02    |
| 631323        | NM_001135115  | Gm12250       | 45.25           | -1.17                 | 0.31         | -3.78       | 1.56E-04      | 3.11E-02    |
| 23961         | NM_001083925  | Oasl1b        | 53.98           | -0.93                 | 0.25         | -3.76       | 1.70E-04      | 3.33E-02    |
| 71724         | NM_023617     | Aox3          | 62.06           | -1.23                 | 0.33         | -3.70       | 2.15E-04      | 4.14E-02    |
| 68404         | NM_153529     | Nrn1          | 151.87          | -0.81                 | 0.22         | -3.68       | 2.29E-04      | 4.32E-02    |

66  
67

68 **Table S1. Top ranked 55 differentially expressed transcripts.**



Supplementary Table 2: Summary of Gene Ontology enrichment analysis for genes showing decreased mRNA levels in mixed infection vs. *E. coli* only infection

| GOid       | Top 50 genes |      |      |                       | Top 60 genes |      |      |                       | Top 70 genes |      |      |                       | GO Term                              |
|------------|--------------|------|------|-----------------------|--------------|------|------|-----------------------|--------------|------|------|-----------------------|--------------------------------------|
|            | N            | O    | E    | $P_{adj}(-\log_{10})$ | N            | O    | E    | $P_{adj}(-\log_{10})$ | N            | O    | E    | $P_{adj}(-\log_{10})$ |                                      |
| GO:0043207 | 19           | 0.45 | 0.05 | 11.76                 | 21           | 0.45 | 0.05 | 13.05                 | 22           | 0.42 | 0.05 | 13.14                 | response to external biotic stimulus |
| GO:0051707 | 19           | 0.45 | 0.05 | 11.76                 | 21           | 0.45 | 0.05 | 13.05                 | 22           | 0.42 | 0.05 | 13.14                 | response to other organism           |
| GO:0045087 | 17           | 0.40 | 0.03 | 11.60                 | 18           | 0.38 | 0.03 | 11.89                 | 20           | 0.38 | 0.03 | 13.45                 | innate immune response               |
| GO:0034097 | 17           | 0.40 | 0.04 | 11.35                 | 17           | 0.36 | 0.04 | 10.39                 | 17           | 0.33 | 0.04 | 9.56                  | response to cytokine                 |
| GO:0009607 | 19           | 0.45 | 0.05 | 11.34                 | 21           | 0.45 | 0.05 | 12.58                 | 22           | 0.42 | 0.05 | 12.65                 | response to biotic stimulus          |
| GO:0002252 | 15           | 0.36 | 0.04 | 7.49                  | 16           | 0.34 | 0.04 | 7.74                  | 17           | 0.33 | 0.04 | 8.01                  | immune effector process              |
| GO:0050776 | 9            | 0.21 | 0.04 | 2.50                  | 9            | 0.19 | 0.04 | 2.09                  | 10           | 0.19 | 0.04 | 2.53                  | regulation of immune response        |
| GO:0031347 | 9            | 0.21 | 0.04 | 2.37                  | 9            | 0.19 | 0.04 | 1.96                  | 9            | 0.17 | 0.04 | 1.60                  | regulation of defense response       |

Notes:

GOid: unique Gene Ontology Consortium term identifier

N: number of genes of interest annotated to the term

O: observed frequency of annotation to term in gene set of interest

E: expected frequency of annotation to this term

$P_{adj}(-\log_{10})$ : P value from Fisher's Exact Test (adjusted for number of terms tested)

Term: Gene Ontology Biological Process term

69  
70

71 **Table S2. Summary of Gene Ontology enrichment analysis for genes showing**  
 72 **decreased mRNA levels in mixed infection as compared to *E. coli* only**  
 73 **infection.**
